# Supplementary material for: An Electrospun Porous CuBi2O4 Nanofiber Photocathode for Efficient Solar Water Splitting
Source: MDPI journal article supplement (doi:10.3390/polym13193341), 2021-09-29
Supplement: s1 [file s1]

*Supplementary Materials*

# **An Electrospun Porous CuBi<sub>2</sub>O<sub>4</sub> Nanofiber Photocathode for Efficient Solar Water Splitting**

**Xiuhua Yuan <sup>1</sup>, Yeling Liu <sup>2</sup>, Hui Yuan <sup>2</sup>, Bingxin Liu <sup>2</sup>, Tianyu Guo <sup>3</sup>, Huawei Zhou <sup>2</sup> and Xia Li <sup>2,\*</sup>**

<sup>1</sup> School of Mechanical and Automotive Engineering, Liaocheng University, 252000 Liaocheng, China; yuanxiuhua@lcu.edu.cn

<sup>2</sup> Department of Chemistry, Liaocheng University, 252000 Liaocheng, China; 1910120301@stu.lcu.edu.cn (Y.L.); 2010120316@stu.lcu.edu.cn (H.Y.); 2018204269@stu.lcu.edu.cn (B.L.); huaweizhou@lcu.edu.cn (H.Z.)

<sup>3</sup> Department of Art and Science, University of Vermont, Burlington, 05405 Vermont, USA; tguo18@jh.edu

\* Correspondence: [lixia@lcu.edu.cn](mailto:lixia@lcu.edu.cn)

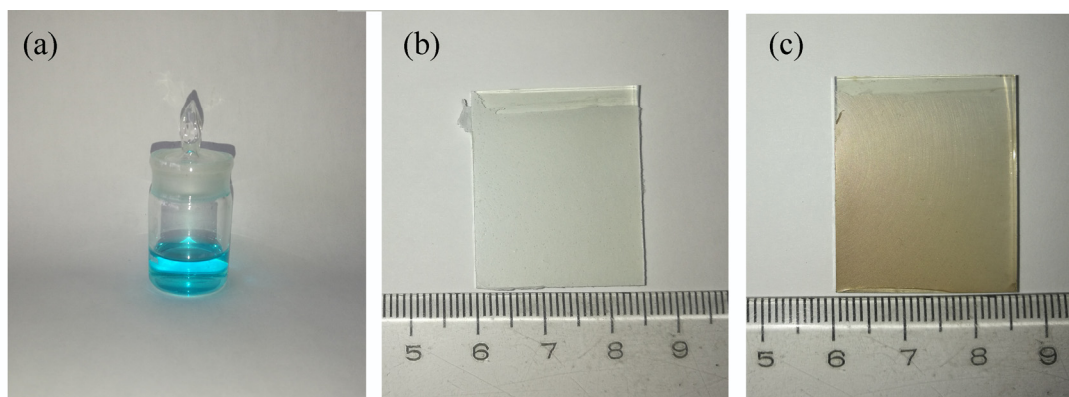

**Figure S1.** Digital micrograph of (a) solution precursor, (b) PVP-CuBi<sub>2</sub>O<sub>4</sub> nanofiber mat before annealing and (c) CuBi<sub>2</sub>O<sub>4</sub> nanofiber mat after annealing

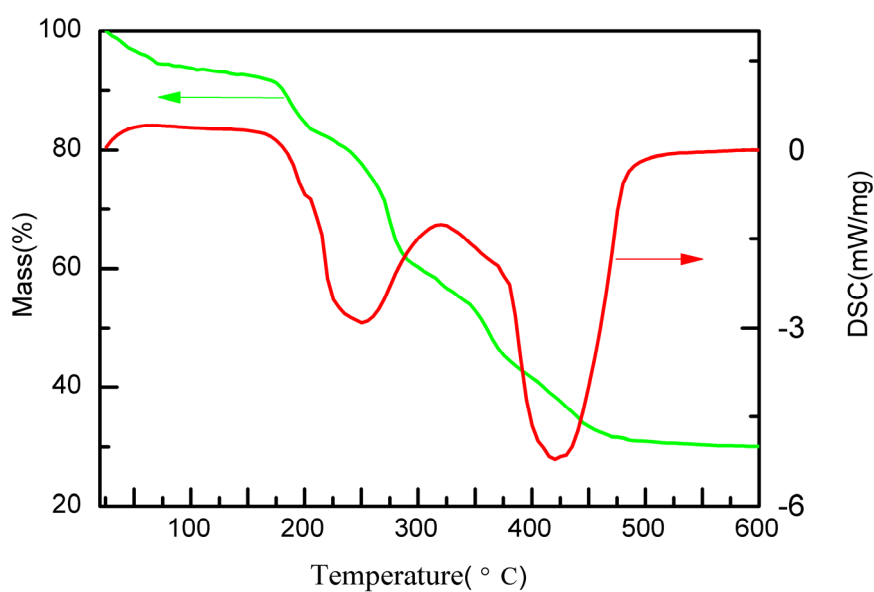

**Figure S2.** TG-DSC curve of the crystallization of CuBi<sub>2</sub>O<sub>4</sub> nanofiber

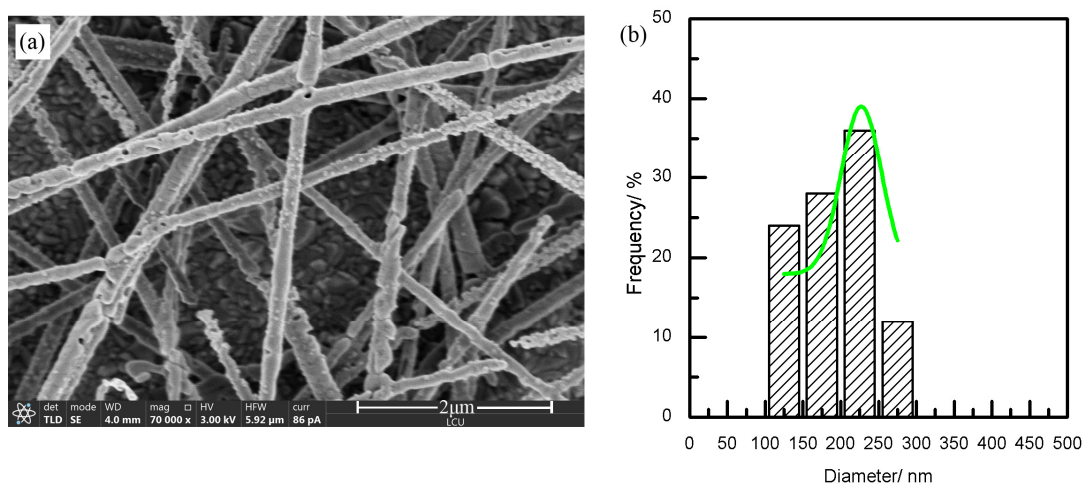

**Figure S3.** CuBi<sub>2</sub>O<sub>4</sub> nanofiber (a) SEM, (b) corresponding diameter distribution

**Table S1.** Comparison of photocurrent data reported in the literature with the photocurrent value obtained in the present study

| Fabrication method         | Photocathode                                | Band gap(eV) | Performance (at 0.6 V RHE )   | Ref              |
|----------------------------|---------------------------------------------|--------------|-------------------------------|------------------|
| Pulsed laser deposition    | pristine nanofilm                           | 1.92         | 0.02 mA/cm <sup>2</sup>       | 1                |
| electrochemical deposition | nanoparticle film                           | 1.6          | 0.06 mA/cm <sup>2</sup>       | 2                |
| Spray pyrolysis            | pristine nanofilm                           | 1.46         | <0.30 mA/cm <sup>2</sup>      | 3                |
| drop casting               | nanotextured films                          | 1.82         | 0.09 mA/cm <sup>2</sup>       | 4                |
| drop casting               | porous films with Cu:Bi=0.55                | 1.67         | 0.14 mA/cm <sup>2</sup>       | 5                |
| drop casting               | nanofilm consist of open windows and struts | 1.5          | 0.15 mA/cm <sup>2</sup>       | 6                |
| <b>Electrospun</b>         | <b>pristine nanofiber</b>                   | <b>1.8</b>   | <b>0.12 mA/cm<sup>2</sup></b> | <b>This work</b> |
| drop-casting               | nanofilm with gradient self-doping          | /            | 0.50 mA/cm <sup>2</sup>       | 7                |
| <b>Electrospun</b>         | <b>nanofiber decorated with Pt</b>          | <b>1.8</b>   | <b>0.21 mA/cm<sup>2</sup></b> | <b>This work</b> |

#### Reference

1. Gottesman, R.; Song, A.; Levine, I.; Krause, M.; Chemseddine, A. Pure CuBi<sub>2</sub>O<sub>4</sub> photoelectrodes with increased stability by rapid thermal processing of Bi<sub>2</sub>O<sub>3</sub>/CuO grown by pulsed laser deposition. *Adv. Funct. Mater.* 2020, 30, 1910832- 1910845.
2. Cao, D.; Nasori, N.; Wang, Z.; Yan, M.; Yong, L. p-type CuBi<sub>2</sub>O<sub>4</sub>: an easily accessible photocathodic material for high-efficient water splitting. *J. Mater. Chem. A* 2016, 4, 8995-9001.
3. Wang, F.; Chemseddine, A.; Abdei, F.; Krol, R.V.D.; Berglund, S.P. Spray pyrolysis of CuBi<sub>2</sub>O<sub>4</sub> photocathodes: improved solution chemistry for highly homogeneous thin films. *J. Mater. Chem. A* 2017, 5, 12838 - 12847.
4. Li, J.; Griep, M.; Choi, Y. S.; Chu, D. Photoelectrochemical overall water splitting with textured CuBi<sub>2</sub>O<sub>4</sub> as a photocathode. *Chem. Commun.* 2018; 54, 3331-3334.
5. Xu, Y.; Jian, J.; Li, F.; Liu, W.; Jia, L.; Wang, H. Porous CuBi<sub>2</sub>O<sub>4</sub> photocathodes with rationally engineered morphology and composition towards high-efficiency photoelectrochemical performance. *J. Mater. Chem. A.* 2019, 7, 21997-22004.
6. Berglund, S. P.; Abdi, F. F.; Bogdanoff, P.; Chemseddine, A.; Friedrich, D.; Roel V.D.K. Comprehensive evaluation of CuBi<sub>2</sub>O<sub>4</sub> as a photocathode material for photoelectrochemical water splitting. *Chem. Mater.* 2016, 28, 4231–4242.

7. Wang, F.; Septina, W.; Chemseddine, A.; Abdi, F.F.; Friedrich, D.; Bogdanoff, P.; Krol, R.V.D.; Tilley, D.; Berglund S.P. Gradient self-doped  $\text{CuBi}_2\text{O}_4$  with highly improved charge separation efficiency. *J. Am. Chem. Soc.* 2017, 139, 15094 - 15103.
